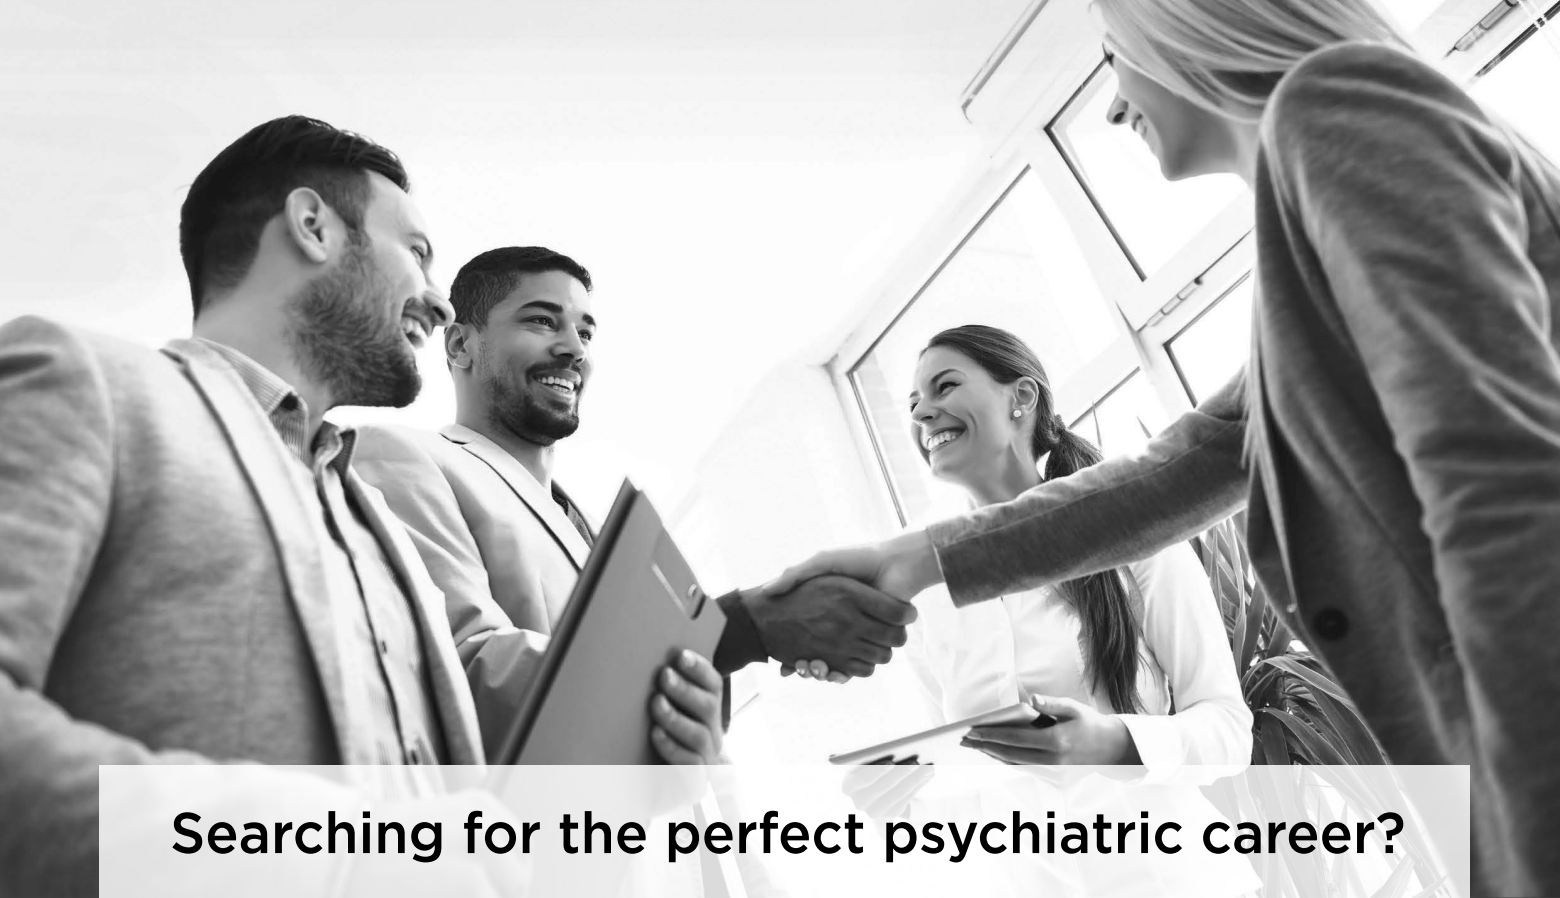

Searching for the perfect psychiatric career?

**Let APA JobCentral help!**

### Manage Your Career

- Browse hundreds of active job listings!
- Create an account to save jobs, store multiple resumes and cover letters and communicate with employers through our internal messaging system.
- Set up multiple job alerts specifying your skills, interests and location to receive e-mails when employers post jobs that match your criteria.

### Recruit for Open Positions

- Post your job in front of thousands of highly qualified psychiatrists.
- Cross promote your job listing in *Psychiatric News*.
- Search the anonymous resume database to find your ideal candidate.

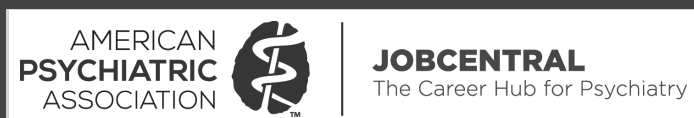

[jobs.psychiatry.org](http://jobs.psychiatry.org)

## Subscription and Business Information

*The American Journal of Psychiatry*, ISSN 0002-953X, is published monthly by the American Psychiatric Association.

The American Psychiatric Association does not hold itself responsible for statements made in its publications by contributors or advertisers. Unless so stated, material in *The American Journal of Psychiatry* does not reflect the endorsement, official attitude, or position of the American Psychiatric Association or of the Journal's Editorial Board.

Periodicals postage paid at Washington, DC, and additional mailing offices. POSTMASTER: Send address changes to *The American Journal of Psychiatry*, Circulation Department, American Psychiatric Association, 800 Maine Avenue, S.W., Suite 900, Washington, D.C. 20024.

### Editorial Office

*American Journal of Psychiatry*  
American Psychiatric Association  
800 Maine Avenue, S.W., Suite 900  
Washington, D.C. 20024  
E-mail: [ajp@psych.org](mailto:ajp@psych.org)

### Customer Service

Phone: (800) 368-5777 (toll-free)  
E-mail: [appi@psych.org](mailto:appi@psych.org)

### APA Member Subscription Services

Phone: (888) 35-PSYCH (toll-free)

### Subscriptions

Per year: individual \$333.00,  
international \$500.00

Institutional subscriptions are tier priced. For institutional site license or pricing information, contact (202) 559-3729 or [institutions@psych.org](mailto:institutions@psych.org).

*Additional subscription options, including single issues and student rates*  
Contact Customer Service

### Advertising

*Pharmaceutical Print and Online Advertising*  
Frank Cox, Kathleen Harrison, Tim Wolfinger  
Pharmaceutical Media, Inc.  
30 East 33rd Street  
New York, NY 10016  
Phone: (212) 904-0379  
E-mail: [twolfinger@pminy.com](mailto:twolfinger@pminy.com)

### *Nonpharmaceutical and Online Sales*

Eamon Wood  
Pharmaceutical Media, Inc.  
E-mail: [ewood@pminy.com](mailto:ewood@pminy.com)  
(see address and phone above).

### Permissions and Reprints

Material published in the journals of the American Psychiatric Association and American Psychiatric Association Publishing is protected by copyright and all rights are reserved. Material may not be reproduced in any form or by any means without written permission from the copyright owner. For permission to reproduce material published by APA, please visit <http://www.appi.org/customer-service/permissions> for more information. Permission can also be secured through the Copyright Clearance Center ([www.copyright.com](http://www.copyright.com)).

APA does not require that permission be obtained for the photocopying of isolated articles for nonprofit classroom or library reserve use; all fees associated with such permission are waived. This consent does not extend to other kinds of copying, such as copying for general distribution, for advertising or promotional purposes, for creating new collective works, or for resale. Requests for commercial distribution should be directed to (202) 609-7075.

For bulk reprints, please contact Jane Cha, (202) 609-7075; e-mail: [jcha@psych.org](mailto:jcha@psych.org).

Indexed in Abstracts for Social Workers, Academic Abstracts, Biological Abstracts, Chemical Abstracts, Chicago Psychoanalytic Literature Index, Cumulative Index to Nursing Literature, Excerpta Medica, Hospital Literature Index, Index Medicus, International Nursing Index, Nutrition Abstracts, Psychological Abstracts, Science Citation Index, Social Science Source, and Social Sciences Index.

Pages are produced by Sheridan Journal Services (Waterbury, VT) and printed by Sheridan NH (Hanover, NH) on acid-free paper effective with Volume 169, Number 1, January 2012.

© 2018 American Psychiatric Association.

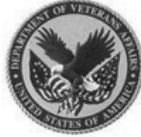

## ACOS Behavioral Health - VA Pittsburgh Healthcare System

The VA Pittsburgh Healthcare System (VAPHS) is seeking a leader to serve as Associate Chief of Staff for Behavioral Health. We are tertiary care 1A VA facility that serves Western Pennsylvania and parts of Ohio and West Virginia. The VAPHS Behavioral Service Line operates a 78 bed inpatient behavioral health facility and conducts over 100,000 outpatient visits yearly. There are currently over 100 behavioral health providers in the service line.

The candidate will serve in a major leadership position at VAPHS, with responsibility for oversight of the quality and programmatic development of behavioral health clinical care, investigation, and education, including the training of medical students, residents, and other trainees. A candidate is sought with an established track record as a clinical leader in behavioral health, who has also had experience in medical education and research. The position will offer extensive opportunities for fostering and participating in collaborative initiatives between VAPHS and its academic affiliates that aim to advance clinical care of Veterans with behavioral health disorders. The position is open to physicians, psychologists, nurses, and social workers with expertise in these areas. Joint appointment at the University of Pittsburgh is available and desirable. Inquiries about the position can be addressed to Steven Graham M.D., PhD ([steven.graham@va.gov](mailto:steven.graham@va.gov)), Chairperson, Search Committee. Vacancy announcements are posted on USAJobs – <https://www.usajobs.gov/>.

**VAPHS is an Equal Opportunity Employer.**

# Adult Psychiatrists Outpatient

## MINNESOTA

**Share your expertise in an environment that supports new treatments and innovation while embracing a strong work-life balance.**

HealthPartners is a dynamic multi-specialty medical group headquartered in the Twin Cities of Minneapolis/St. Paul, Minnesota. Our Behavioral Health group has a large outpatient practice with 21 adult and 4 child psychiatrists, 7 clinical nurse specialists and 60 therapists. Practicing as generalists, each provides integrated outpatient services to our diverse patient population within our primary care and specialty clinics.

We have exciting practice opportunities for BC/BE Outpatient Adult Psychiatrists, and offer:

- Full-time and part-time practices
- Competitive pay
- A generous benefits package, including relocation assistance, employer-matched 401(k) and 457(b), malpractice coverage, and competitive PTO and CME
- Minimal outpatient call requirements (pager/phone)
- Affiliation with multiple hospitals and clinics, including inpatient psychiatry, intensive day programs, chemical dependency programs and eating disorder programs
- A large internal referral base
- Exceptional nursing support and psychotherapy colleagues
- An organizational commitment to a sustainable medical practice with EHR, documentation efficiency work group, extensive billing and coding support, integrated services and telemedicine

HealthPartners' integrated health care system is recognized locally and nationally for great care and leadership. We believe outstanding health care is delivered when we merge the science of medicine with the compassion, spirit and humanity of our hearts. We refer to this as "Head + Heart, Together," inspiring constant improvement and lasting success. As a unified team, we engage patients, families and the community and put them at the center of everything we do.

Learn more by emailing your CV and cover letter to [lori.m.fake@healthpartners.com](mailto:lori.m.fake@healthpartners.com) or by applying online at [healthpartners.com/careers](http://healthpartners.com/careers).

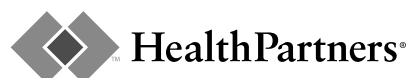

## The Art and Science of Brief Psychotherapies *A Practitioner's Guide, Third Edition*

Edited by Mantosh J. Dewan, M.D.,  
Brett N. Steenbarger, Ph.D., and Roger P. Greenberg, Ph.D.

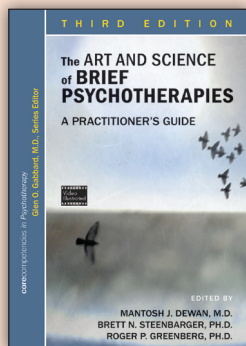

**Just Published!**

**Video Illustrated**

Each chapter is thoroughly updated, and new chapters cover such topics as dialectical behavior therapy, multicultural practice, and mentalizing, as well as fresh approaches to intervention, such as telepsychiatry and Internet-based interventions.

2018 • 397 pages • ISBN 978-1-61537-079-5 • Paperback • \$87.00 • Item #37079

2018 • 397 pages • ISBN 978-1-61537-151-8 • eBook • \$70.00 • Item #37151

AMERICAN  
PSYCHIATRIC  
ASSOCIATION  
PUBLISHING

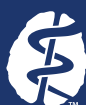

www.appl.org  
Email: [appl@psych.org](mailto:appl@psych.org)  
Phone: 1-800-368-5777

AH1744A



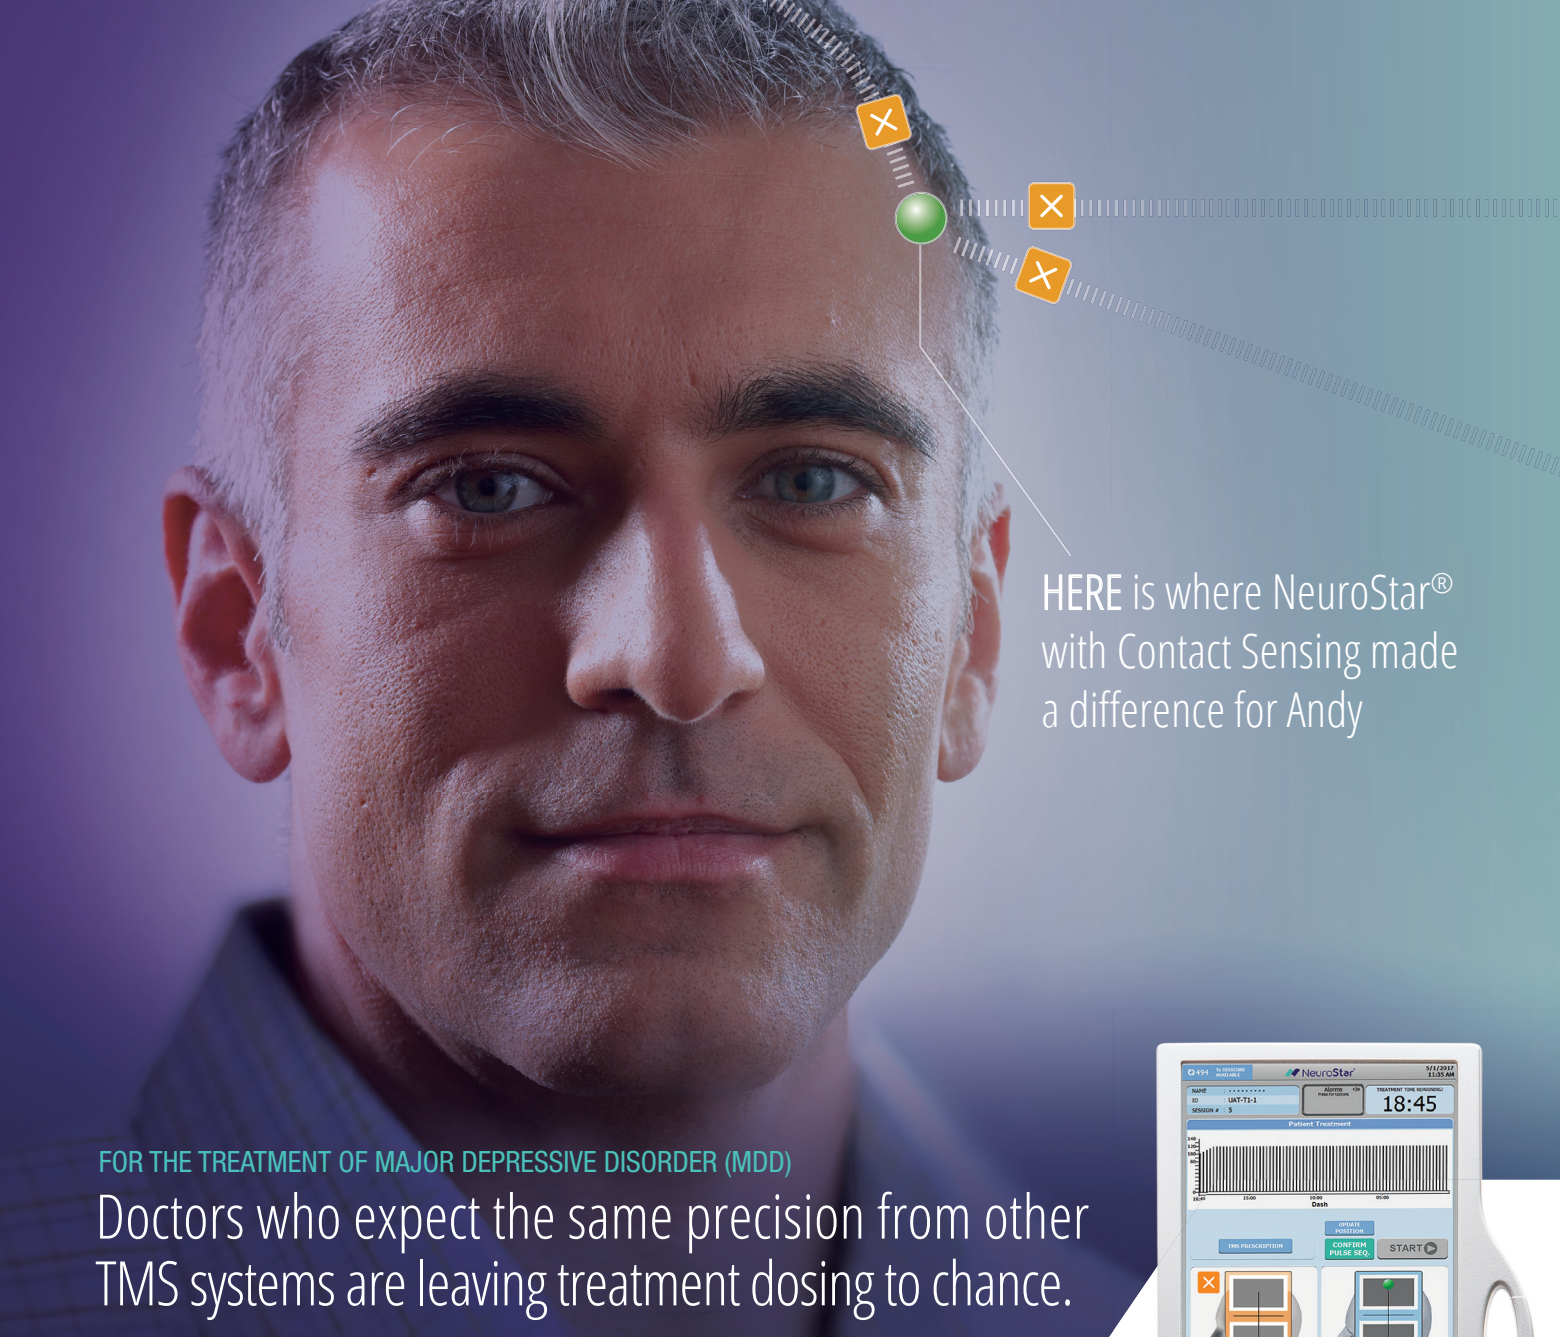

HERE is where NeuroStar® with Contact Sensing made a difference for Andy

**FOR THE TREATMENT OF MAJOR DEPRESSIVE DISORDER (MDD)**

Doctors who expect the same precision from other TMS systems are leaving treatment dosing to chance.

When contact with the head is off by just 1 mm, as much as a 40% loss in the prescribed TMS dose can occur.<sup>1</sup> **Only NeuroStar Advanced Therapy** with Contact Sensing precisely monitors treatment delivery in 3 dimensions and alerts the clinician if the coil loses contact, ensuring that the full dose is being administered.

**When remission from MDD is at stake, precision matters. Trust the #1 TMS choice of doctors like you.**

**INDICATION**

NeuroStar® is indicated for the treatment of Major Depressive Disorder in adult patients who have failed to receive satisfactory improvement from prior antidepressant medication in the current episode.

**IMPORTANT INFORMATION**

The most common side effect is pain or discomfort at or near the treatment site. These events are transient; they occur during the TMS treatment course

and do not occur for most patients after the first week of treatment. NeuroStar Advanced Therapy should not be used with patients who have non-removable conductive metal in or near the head.

NeuroStar Advanced Therapy is available by prescription only. Please visit [NeuroStar.com](http://NeuroStar.com) for full safety and prescribing information.

**Reference:** 1. Neuronetics, Inc., Data on file.

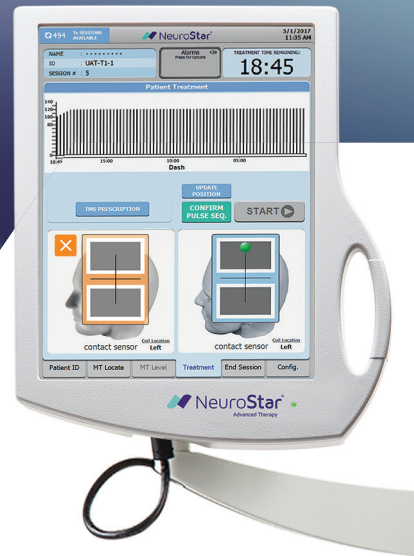

**NeuroStar.com**  
**1-877-600-7555**

**RIGHT DOSE. RIGHT LOCATION.**  
**EVERY TIME.**

 **NeuroStar®**  
Advanced Therapy
