# The American Journal of Psychiatry

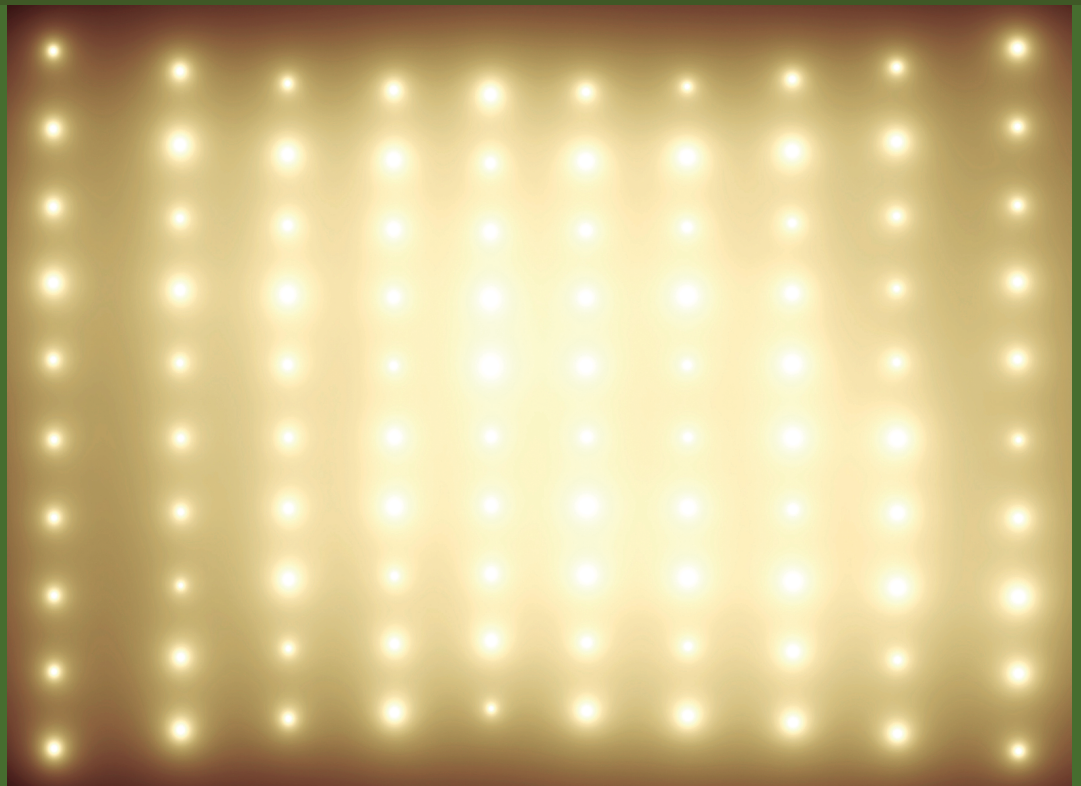

Adjunctive Bright Light Therapy for Bipolar Depression:  
A Randomized Double-Blind Placebo-Controlled Trial

Late-Onset ADHD Reconsidered With Comprehensive  
Repeated Assessments Between Ages 10 and 25

Effect of a Single Dose of Intravenous Ketamine on Suicidal Ideation:  
A Systematic Review and Individual Participant Data Meta-Analysis

Methylphenidate for Apathy in Community-Dwelling  
Older Veterans With Mild Alzheimer's Disease

AMERICAN  
PSYCHIATRIC  
ASSOCIATION

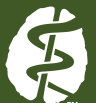

[ajp.psychiatryonline.org](http://ajp.psychiatryonline.org)
