# We've got you covered.

For over 30 years, we have provided psychiatrists with exceptional protection and personalized service. We offer comprehensive insurance coverage and superior risk management support through an "A" rated carrier.

## ANNOUNCING NEW ENHANCEMENTS TO THE AMERICAN PSYCHIATRIC ASSOCIATION PSYCHIATRISTS' PROFESSIONAL LIABILITY PROGRAM:

- **Defense Expenses related to Licensing Board Hearings and Other Proceedings:** Increased Limit to \$50,000 per proceeding with NO annual aggregate (higher limits are available up to \$150,000)
- **Fire Legal Liability Coverage:** Limit of liability increased to \$150,000 for fire damage to third party property
- **Emergency Aid Coverage:** Reimbursement up to \$15,000 in costs and expenses for medical supplies
- Insured's **Consent to Settle** is now required in the settlement of any claim – No arbitration clause!
- **First Party Assault and Battery Coverage:** Up to \$25,000 reimbursement for medical expenses related to injuries and/or personal property damage caused by a patient or client
- **Medical Payments Coverage:** Increased limit to \$100,000 for Medical Payments to a patient or client arising from bodily injury on your business premises

## IN ADDITION WE CONTINUE TO OFFER THE FOLLOWING MULTIPLE PREMIUM DISCOUNTS:

- **50% Resident-Fellow Member Discount**
- **Up to 50% New Doctor Discount** (for those who qualify)
- **50% Part Time Discount** for up to 20 client hours a week or less
- **10% New Policyholder Discount** (must be claims free for the last 6 months)
- **15% Child and Adolescent Psychiatrist Discount** for those whose patient base is more than 50% Children and Adolescents
- **10% Claims Free Discount** for those practicing 10 years, after completion of training, and remain claims free
- **5% Risk Management Discount** for 3 hours of CME

*(Above Coverage Features and Discounts are subject to individual state approval)*

Visit us at [apamalpractice.com](http://apamalpractice.com) or call **877.740.1777** to learn more.

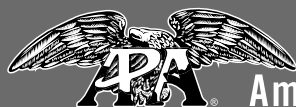

**American Professional Agency**

LEADERS IN PSYCHIATRIC MEDICAL LIABILITY INSURANCE

ENDORSED BY THE  
AMERICAN PSYCHIATRIC  
ASSOCIATION

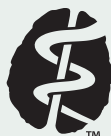

## Officers 2017–2018

### President

Anita S. Everett, M.D.

### President-Elect

Altha J. Stewart, M.D.

### Treasurer

Bruce J. Schwartz, M.D.

### Secretary

Philip R. Muskin, M.D., M.A.

### Assembly

#### Speaker

Theresa M. Miskimen, M.D.

#### Speaker-Elect

James R. Batterson, M.D.

#### Recorder

Steven R. Daviss, M.D.

### Office of the CEO and Medical Director

*CEO and Medical Director*

Saul Levin, M.D., M.P.A.

### Board of Trustees

Jeffrey Akaka, M.D.

Lama Bazzi, M.D.

Renée L. Binder, M.D.

Jenny Boyer, M.D., Ph.D., J.D.

Ronald M. Burd, M.D.

Tanuja Gandhi, M.D.

Jeffrey L. Geller, M.D., M.P.H.

Uchenna B. Okoye, M.D., M.P.H.

Maria A. Oquendo, M.D., Ph.D.

Roger Peele, M.D.

Vivian B. Pender, M.D.

Paul Summergrad, M.D.

Richard F. Summers, M.D.

Ramaswamy Viswanathan, M.D., D.M.Sc.

Melinda Young, M.D.

## Editorial Board

### Editor

Robert Freedman, M.D.

### Deputy Editors

David A. Lewis, M.D.

Robert Michels, M.D.

Daniel S. Pine, M.D.

A. John Rush, M.D.

Susan K. Schultz, M.D.

Carol A. Tamminga, M.D.

### Associate Editors

Alan Brown, M.D., M.P.H.

Tyrone Cannon, Ph.D.

Benjamin G. Druss, M.D., M.P.H.

Felton Earls, M.D.

Graham J. Emslie, M.D.

Javier I. Escobar, M.D., M.Sc.

Yasmin Hurd, Ph.D.

Carlos López Jaramillo, M.D., M.Sc.,  
Ph.D.

Joan L. Luby, M.D.

Constantine G. Lyketsos, M.D., M.H.S.

Helen S. Mayberg, M.D., F.R.C.P.C.

Terrie E. Moffitt, Ph.D.

Rajesh Narendran, M.D.

Roy Perlis, M.D.

Anita Thapar, M.B.B.Ch., F.R.C.Psych.,  
Ph.D., F.Med.Sci.

Mauricio Tohen, M.D., Dr.PH., M.B.A.

Eduard Vieta, M.D., Ph.D.

John T. Walkup, M.D.

Katherine L. Wisner, M.D., M.S.

Xin Yu, M.D.

### Editor Emerita

Nancy C. Andreasen, M.D., Ph.D.

### Former Editors

Amariah Brigham, M.D., 1844–1849

T. Romeyn Beck, M.D., 1849–1854

John P. Gray, M.D., 1854–1886

G. Alder Blumer, M.D., 1886–1894

Richard Dewey, M.D., 1894–1897

Henry M. Hurd, M.D., 1897–1904

Edward N. Brush, M.D., 1904–1931

Clarence B. Farrar, M.D., 1931–1965

Francis J. Braceland, M.D., 1965–1978

John C. Nemiah, M.D., 1978–1993

### Editorial Staff

#### Executive Editor

Michael D. Roy

#### Senior Editor

John J. Guardiano, Ph.D.

#### Production Manager

Susan Westrate

#### Assistant Editor

Angela Moore

#### Online Content Manager

Michael Pogachar

#### Editorial Support Services Manager

Heidi Koch

#### Editorial Assistant

Linda LaCour

#### Editorial Assistant/ Permissions Coordinator

Efrem Tuquabo

#### Spanish Content Manager

Sergi Casals, M.A.

#### Assistants to the Editors

Lois Lilienthal

Laura English

Rachel Hogg

Russell A. Scholl

### Interim Publisher

John McDuffie

# Psychiatric Research and Clinical Practice

Edited by Kimberly A. Yonkers, M.D.

An Open-Access Journal From the American Psychiatric Association

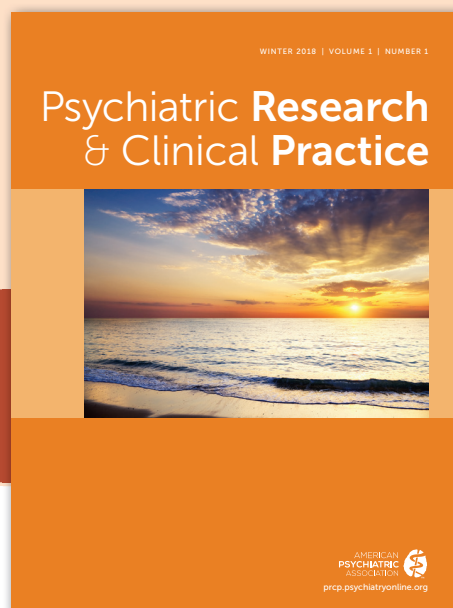

Psychiatric Research and Clinical Practice (PRCP) is a new peer-reviewed, open-access journal from the American Psychiatric Association that offers a high-profile publishing destination for peer-reviewed submissions that build upon the psychiatric knowledge base and bring research findings closer to clinical utility through deeper investigation.

Submissions on all aspects of mental and behavioral health to inform the field from bench to bedside are welcome. PRCP seeks to occupy that place between research and clinical utility, leaning toward clinical utility through publication of replication studies and features that show how new scientific knowledge can inform clinical practice. The journal will also feature “Clinical Pearls”—accounts by clinicians using the findings from the most up-to-date clinical research to help solve problems commonly confronted in clinical practice.

PRCP maintains the rigorous standards of APA’s scholarly publications while providing an essential resource for today’s practicing physicians. Published in accordance with open-access principles, PRCP makes all of its content immediately available for free—the reach one wants from an established and respected publisher.

Psychiatric Research and Clinical Practice is committed to keeping the field of psychiatry vibrant and relevant by publishing wide-ranging information on all aspects of mental and behavioral health and enhancing APA’s leadership role in scientific publishing in psychiatry by expanding the amount of research, clinical practice, and systems of care content available to the field.

## About the Editor

Kimberly A. Yonkers, M.D., is Professor of Psychiatry, Epidemiology, Obstetrics/Gynecology, and Reproductive Sciences and Director of the Center for Wellbeing of Women and Mothers at Yale University. She brings to the task of serving as PRCP’s Editor a broad and deep experience in research and clinical work. Her research includes investigations into the clinical course, etiopathology, and treatment of psychiatric disorders as they occur in women. A major component of this work includes investigations into the occurrence and treatment of illnesses in pregnancy and the postpartum period and across the menstrual cycle. This area, by its nature, cuts across disciplines and requires psychiatric expertise as well as knowledge in neuroscience and reproductive biology. Her work has also included determining optimal methods for screening and treating women for substance use problems when they are pregnant or postpartum.

## PERSPECTIVES

### EDITORIALS

- 95 **Growing Up: Evolving Concepts of Adult Attention Deficit Hyperactivity Disorder**  
*Philip Shaw, B.M., B.Ch., Ph.D.*
- 97 **Antisuicidal Effects of Ketamine: A Promising First Step**  
*Madhukar H. Trivedi, M.D.*
- 99 **Why Apathy in Alzheimer's Matters**  
*David L. Sultzer, M.D.*
- 101 **Optimizing the Pharmacologic Treatment of Individuals With First-Episode Psychosis**  
*Donald C. Goff, M.D.*

### TREATMENT IN PSYCHIATRY

103 **Prolonged Postconcussive Symptoms**

*Davin K. Quinn, M.D., et al.* CME • AUDIO

**Clinical Guidance:** Prolonged postconcussive symptoms, often termed traumatic brain injury (TBI), reflect multiple factors across a neurological–psychogenic spectrum. The patient presented here was treated with methylphenidate and cognitive-behavioral therapy.

### PERSPECTIVES IN GLOBAL MENTAL HEALTH

112 **The “Loss of Pride” Syndrome in Yazidi Refugees**

*Rami Bou Khalil, M.D., M.Sc., et al.*

**Clinical Guidance:** Ethnic pride among Yazidis, an ethnically Kurdish religious community, has been wounded by recent genocidal killings and kidnappings in Iraq and Syria, but it is also a source of strength for refugees who have lost loved ones.

### REVIEWS AND OVERVIEWS

114 **The Neurodevelopmental Basis of Early Childhood Disruptive Behavior: Irritable and Callous Phenotypes as Exemplars**

*Lauren S. Wakschlag, Ph.D., et al.* CME • AUDIO

**Clinical Guidance:** Disruptive behavior in childhood is related both to irritability from disruptions in prefrontal regulation of attention and emotion and to callous behavior from abnormal fear processing. These early childhood disruptive behavior phenotypes share many features with the DSM-5 neurodevelopmental disorders and predict continuing psychopathology into adulthood.

## NEW RESEARCH

### ARTICLES

131 **Adjunctive Bright Light Therapy for Bipolar Depression: A Randomized Double-Blind Placebo-Controlled Trial**

*Dorothy K. Sit, M.D., et al.* CME • AUDIO

**Clinical Guidance:** Adding midday bright light to the stable medication regimens of patients with bipolar depression produces a higher remission rate (68%) than placebo light therapy (22%), without mood polarity switches.

## Articles, continued

### 140 Late-Onset ADHD Reconsidered With Comprehensive Repeated Assessments Between Ages 10 and 25

Margaret H. Sibley, Ph.D., et al. EDITORIAL • AUDIO • VIDEO

**Clinical Guidance:** Detailed evaluation of ADHD symptoms appearing after childhood found that most represented substance use, another disorder, or nonimpairing cognitive fluctuations. Most late-appearing cases occurred transiently in adolescence.

### 150 The Effect of a Single Dose of Intravenous Ketamine on Suicidal Ideation: A Systematic Review and Individual Participant Data Meta-Analysis

Samuel T. Wilkinson, M.D., et al. EDITORIAL • AUDIO

A patient-level meta-analysis of 11 intervention studies found that a single dose of intravenous ketamine reduces suicidal ideation within a day. The effect is partially independent of effects on mood and may extend up to 1 week.

### 159 Methylphenidate for Apathy in Community-Dwelling Older Veterans With Mild Alzheimer's Disease: A Double-Blind, Randomized, Placebo-Controlled Trial

Prasad R. Padala, M.D., M.S., et al. EDITORIAL

**Clinical Guidance:** A double-blind trial finds that methylphenidate improves apathy in elderly men with mild Alzheimer's disease. Secondary effects are observed on cognition, functional status, caregiver burden, global severity, and depression.

### 169 Psychopharmacological Treatment in the RAISE-ETP Study: Outcomes of a Manual and Computer Decision Support System Based Intervention

Delbert G. Robinson, M.D., et al. EDITORIAL

**Clinical Guidance:** The RAISE medication strategy tailored to first-episode psychosis and using a computerized decision support system increased medication visits and guideline-adherent antipsychotic prescriptions and decreased antidepressant prescriptions, side effects, and weight gain.

### 180 Cortical Functional Connectivity Evident After Birth and Behavioral Inhibition at Age 2

Chad M. Sylvester, M.D., Ph.D., et al. VIDEO

Decreased functional connectivity of the ventral attention and default mode networks in the first month of life is associated with behavioral inhibition at age 2. The findings indicate a congenital origin for later childhood anxiety disorder.

## COMMUNICATIONS AND UPDATES

### LETTERS TO THE EDITOR

#### 188 The Impact of Underpowered Studies on Clinical Trial Results

Arif Khan, M.D., et al.

#### 188 The Importance of Adequately Powered Clinical Studies: Response to Khan et al.

Stephen R. Marder, M.D., et al.

#### 189 Pharmacogenetic Tests in Psychiatry

Chad Bousman, M.P.H., Ph.D., et al.

### BOOK FORUM

#### 190 The Psychoses of Menstruation and Childbearing

Jennifer L. Payne, M.D.

#### 191 Public Health Perspectives on Depressive Disorders

Charles R. Conway, M.D.

## OTHER ITEMS OF INTEREST

### 193 Continuing Medical Education

### A6 Chairpersons of APA Councils, Committees, and Task Forces

### A10 Subscription and Business Information

**Cover:** Dorothy Sit et al. (p. 131), in a randomized, double-blind, placebo-controlled trial, found that bright light therapy, in combination with antimanic medication, improves symptoms of depression in adults with bipolar I or bipolar II disorder. (Image by Conrado, Shutterstock.com).

#### La Tabla de Contenidos de Este Número Está Disponible en Español

*[This issue's Table of Contents is available in Spanish]*

*(Abstracts are also available in Spanish)*

Translation presented in collaboration with the Office of Global Health,  
Rutgers-Robert Wood Johnson Medical School.

Support for this effort provided by ACTA Colombia.

#### Translation courtesy of

**Sergi Casals, M.A.**

Garuna, Medellin, Colombia  
([www.garunaeditors.com](http://www.garunaeditors.com))

**Carlos López Jaramillo, M.D., M.Sc., Ph.D.**

Universidad de Antioquia,  
Medellin, Colombia

**Javier I. Escobar, M.D., M.Sc.**

Rutgers-Robert Wood Johnson  
Medical School

**AUDIO** Highlighted in AJP Audio, a downloadable .mp3 file available at [ajp.psychiatryonline.org](http://ajp.psychiatryonline.org)

**CME** A course covering the content of this article is available online for paid subscribers to the AJP CME Course program

**EDITORIAL** Discussed in one of the issue's editorials

**VIDEO** Highlighted online by Deputy Editor Daniel S. Pine, M.D.

# THE AMERICAN PSYCHIATRIC ASSOCIATION

800 Maine Avenue, S.W., Suite 900, Washington, D.C. 20024

(888) 357-7924 (toll-free inside the U.S. and Canada)

web site: [www.psychiatry.org](http://www.psychiatry.org) • e-mail: [apa@psych.org](mailto:apa@psych.org)

## Chairpersons of Councils, Committees, and Task Forces

### Standing Committees

|                             |                               |
|-----------------------------|-------------------------------|
| <b>Bylaws</b>               | Esperanza Diaz, M.D.          |
| <b>Elections</b>            | Barry K. Herman, M.D.         |
| <b>Ethics</b>               | Ezra Griffith, M.D.           |
| <b>Finance and Budget</b>   | Alan F. Schatzberg, M.D.      |
| <i>Audit</i>                | Bruce J. Schwartz, M.D.       |
| <i>Investment Oversight</i> | David Fassler, M.D.           |
| <b>Joint Reference</b>      | Altha J. Stewart, M.D.        |
| <b>Membership</b>           | Rahn K. Bailey, M.D.          |
| <b>Nominating</b>           | Maria A. Oquendo, M.D., Ph.D. |
| <b>Tellers</b>              | Jose Vito, M.D.               |

### Non-Standing Committee

|                             |                              |
|-----------------------------|------------------------------|
| <b>Conflict of Interest</b> | Philip R. Muskin, M.D., M.A. |
|-----------------------------|------------------------------|

### Councils

#### Council on Addiction Psychiatry

Andrew J. Saxon, M.D.

#### Council on Advocacy and Government Relations

Patrick S. Runnels, M.D.

*Advocacy and Litigation Funding*

Bhasker J. Dave, M.D.

#### Council on Children, Adolescents, and Their Families

Joseph V. Penn, M.D.

#### Council on Communications

Christopher A. (Drew) Ramsey, M.D.

#### Council on Geriatric Psychiatry

Robert P. Roca, M.D.

#### Council on Healthcare Systems and Financing

Harsh K. Trivedi, M.D.

*Integrated Care*

Lori E. Raney, M.D.

*Reimbursement for Psychiatric Care*

Laurence Miller, M.D.

*RBRVS, Codes and Reimbursement*

Gregory G. Harris, M.D.

*Telepsychiatry*

James H. Shore, M.D.

#### Council on International Psychiatry

Bernardo Ng, M.D.

#### Council on Medical Education and Lifelong Learning

Mark H. Rapaport, M.D.

*Scientific Program*

Linda Worley, M.D.

*Vestermark Award Committee*

Lowell D. Tong, M.D.

#### Council on Minority Mental Health and Health Disparities

Christina V. Mangurian, M.D.

#### Council on Psychiatry and Law

Debra A. Pinals, M.D.

*Judicial Action*

Marvin S. Swartz, M.D.

#### Council on Psychosomatic Medicine (Consultation Liaison Psychiatry)

David F. Gitlin, M.D.

#### Council on Quality Care

Grayson Norquist, M.D.

*Mental Health Information Technology*

Brent Nelson, M.D.

*Performance Measures*

Karen Pierce, M.D.

*Practice Guidelines*

Michael J. Vergare, M.D.

#### Council on Research

Dwight L. Evans, M.D.

*Psychiatric Dimensions of Disasters*

Robert J. Ursano, M.D.

# The Residents' JOURNAL

## The American Journal of Psychiatry Residents' Journal

January 2018

Volume 13

Issue 1

### Inside

- 2 Beauty in Ashes: Reflections on Hidden Resilience After a Hospital Shooting**  
Mena Mirhom, M.D.  
*Elucidating the depth and power of the human spirit*
- 3 A Seizure by Any Other Name: Challenges and Long-Term Implications of Psychogenic Nonepileptic Seizures**  
Jordan Yardain Amar, M.S., Rachel Leah Dillinger, B.A., Kimberly Borden, B.A., Victoria Lollo, M.D.  
*Examining comorbidity and predisposing factors, stigma and provider misunderstanding, diagnostic challenges, and appropriate treatment modalities*
- 7 Deep Sea Listening: Oil on Canvas**  
Megan Lin, B.A.  
*Conveying the importance of psychiatrists serving as navigators for patients with mental disorders*
- 8 The Walrus in the Room**  
Ronit S. Shah, M.D.  
*Overcoming dissonance and self-doubt in residency training*
- 9 Response to Joshi and Langley-Degroot**  
Balwinder Singh, M.D., M.S.  
Andrew Hughes, M.D.  
*Continuing the debate on clozapine clinics in psychiatric residency training programs*
- 11 Call for Applications to Join the 2018 Editorial Board**
- 12 Residents' Resources**
- 13 Author Information**

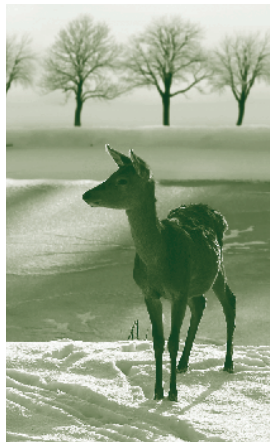

© Shutterstock.com

#### ASSOCIATE EDITORS

Erin Fulchiero, M.D.  
Helena Winston, M.D.

#### MEDIA EDITOR

Shawn E. McNeil, M.D.

#### CULTURE EDITOR

Michelle Liu, M.D.

#### STAFF EDITOR

Angela Moore

#### EDITOR-IN-CHIEF

Rachel Katz, M.D.

#### SENIOR DEPUTY EDITOR

Oliver Glass, M.D.

#### DEPUTY EDITOR

Anna Kim, M.D.

#### EDITORS EMERITI

Katherine Pier, M.D.  
Rajiv Radhakrishnan, M.B.B.S., M.D.  
Misty Richards, M.D., M.S.  
Arshya Vahabzadeh, M.D.  
Monifa Seawell, M.D.  
Sarah M. Fayad, M.D.  
Joseph M. Cerimele, M.D.  
Molly McVoy, M.D.  
Sarah B. Johnson, M.D.

**Editor-in-Chief**  
Rachel Katz, M.D.  
**Senior Deputy Editor**  
Oliver Glass, M.D.  
**Deputy Editor**  
Anna Kim, M.D.  
**Associate Editors**  
Erin Fulchiero, M.D.  
Helena Winston, M.D.

The *Residents' Journal*, the largest and most robust resident-led journal in the house of medicine, is an e-publication that serves as a forum to share your ideas and experiences in training, clinical practice, research, and careers with your colleagues.

To submit a manuscript, please visit [mc.manuscriptcentral.com/appi-ajp](http://mc.manuscriptcentral.com/appi-ajp) and select a manuscript type for AJP Residents' Journal. You may submit a commentary (500 words), book review (500 words), history of psychiatry (500 words), clinical case conference (1,250 words), review article (1,500 words), treatment in psychiatry article (1,500 words), research article (1,250 words), drug review (1,500 words), or letter to the editor (250 words).

If you are interested in serving as a Guest Section Editor for the *Residents' Journal*, please send your CV, and your ideas for topics, to the Editor-in-Chief ([rachel.katz@yale.edu](mailto:rachel.katz@yale.edu)).

To access the complete Residents' Journal archives, visit [ajp.psychiatryonline.org/loi/ajp-rj](http://ajp.psychiatryonline.org/loi/ajp-rj)



# Go Online

Visit [ajp.psychiatryonline.org](http://ajp.psychiatryonline.org) for these features!

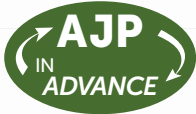

## AJP in Advance

*Discover the latest research advances before they appear in print*

### **Improving the Efficiency of Psychotherapy for Depression: Computer-Assisted Versus Standard CBT**

Cognitive-behavioral therapy (CBT) using an Internet program plus 12 therapist sessions for depression has a remission rate similar to that for standard CBT. Improvements are maintained at 6 months.

### **Impact of SSRI Therapy on Risk of Conversion From Mild Cognitive Impairment to Alzheimer's Dementia in Individuals With Previous Depression**

Patients with mild cognitive impairment who have a prior history of depression and long-term SSRI treatment have a 3-year delayed progression to Alzheimer's dementia relative to those with prior depression and short-term SSRI treatment, treatment with other antidepressants, or no treatment and relative to patients with mild cognitive impairment without a history of depression.

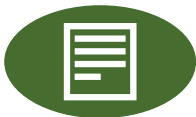

## AJP CME

*Earn CME credit: 3 courses per issue*

This month's courses appear on pages 193–196. Each short course is based on one article in this issue and can earn up to 1 *AMA PRA Category 1 Credit*<sup>™</sup>. CME credit is issued only **online**, and a paid subscription to AJP's CME course program is required.

Visit [psychiatryonline.org/cme](http://psychiatryonline.org/cme) and click on the "American Journal of Psychiatry" tab.

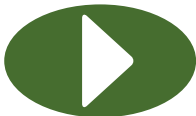

## AJP Multimedia

*Access Audio or Video for highlights of each issue*

In AJP Audio this month, Executive Editor Michael Roy discusses research on bright light therapy for bipolar depression, ketamine for suicidal ideation, a roadmap for understanding neurodevelopmental origins of early childhood disruptive behavior, prolonged symptoms following concussion, and the diagnosis of late-onset ADHD.

In this month's video, Deputy Editor Daniel S. Pine, M.D., discusses the articles "Late-Onset ADHD Reconsidered With Comprehensive Repeated Assessments Between Ages 10 and 25" and "Cortical Functional Connectivity Evident After Birth and Behavioral Inhibition at Age 2."

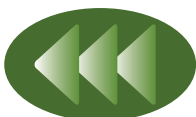

## History of Psychiatry

*Revisit the field's rich history through the pages of AJP*

### **25 years ago this month: "Cognitive Remediation in Schizophrenia: Is It Time Yet?"**

In the February 1993 issue, Dr. Michael Foster Green observes that while research on cognitive deficits in patients with psychotic disorders has made "impressive gains," remediation of such deficits "is largely neglected." He surveys the issues and offers some recommendations as possible starting points for research on cognitive remediation.

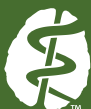

Source: https://psychiatryonline.org/doi/suppl/10.1176/ajp.2018.175.issue-2/suppl_file/front.pdf
